# Supplementary material for: The Dvaraka Initiative: Mars’s First Permanent Human Settlement Capable of Self-Sustenance
Source: MDPI journal article supplement (doi:10.3390/aerospace10030265), 2023-03-09
Supplement: s1 [file s1]

## Article

# The Dvaraka Initiative: Mars's First Permanent Human Settlement Capable of Self-Sustenance

Arvind Mukundan <sup>1</sup>, Akash Patel <sup>2</sup>, Bharadwaj Shastri <sup>1</sup>, Heeral Bhatt <sup>3</sup>, Alice Phen <sup>3</sup> and Hsiang-Chen Wang <sup>1,\*</sup>

**Citation:** Mukundan, A.; Patel, A.; Shastri, B.; Bhatt, H.; Phen, A.; Wang, H.-C. The Dvaraka Initiative: Mars's First Permanent Human Settlement Capable of Self-Sustenance. *Aerospace* **2023**, *10*, 265. <https://doi.org/10.3390/aerospace10030265>

Academic Editor: Shunan Wu

Received: 4 January 2023

Revised: 2 March 2023

Accepted: 7 March 2023

Published: 9 March 2023

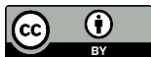

**Copyright:** © 2023 by the authors. Licensee MDPI, Basel, Switzerland. This article is an open access article distributed under the terms and conditions of the Creative Commons Attribution (CC BY) license (<https://creativecommons.org/licenses/by/4.0/>).

- <sup>1</sup> Department of Mechanical Engineering, Advanced Institute of Manufacturing with High Tech Innovations (AIM-HI), Center for Innovative Research on Aging Society (CIRAS), National Chung Cheng University, 168, University Road, Min Hsiung, Chiayi City 62102, Taiwan; d09420003@ccu.edu.tw (A.M.)
- <sup>2</sup> Robotics & AI Team, Department of Computer, Electrical and Space Engineering, Luleå University of Technology, SE-97187 Luleå, Sweden
- <sup>3</sup> Department of Computer, Electrical and Space Engineering, Luleå University of Technology, SE-97187 Luleå, Sweden
- \* Correspondence: hcwang@ccu.edu.tw

**Abstract:** This study provides the supplementary for the article, The Dvaraka Initiative: First Self-Sustaining Human Settlement on Mars.

**Keywords:** Mars colonization; Jezero; thermomechanical coating; asteroid mining; space tourism

## 1. Pre-Initiative Mission

**Table S1.** Contents and cost of the first five missions.

| Missions  | Equipment                  | Material Cost estimation | Weight (kg) | Transport cost | Total cost      |
|-----------|----------------------------|--------------------------|-------------|----------------|-----------------|
| Mission-1 | Unpressurized rovers       | \$350,000,000            | 225,000     | \$112,500,000  | \$1,287,500,000 |
|           | Load carrying trucks       | \$575,000,000            |             |                |                 |
|           | Nuclear generator          | \$100,000,000            |             |                |                 |
|           | Fuel processing equipment  | \$150,000,000            |             |                |                 |
| Mission-2 | Pressurized rovers         | \$745,000,000            | 340,000     | \$170,000,000  | \$1,096,300,000 |
|           | Cooling equipment          | \$65,000,000             |             |                |                 |
|           | Heavy duty equipment       | \$116,300,000            |             |                |                 |
|           | Water extraction equipment | \$575,000,000            |             |                |                 |
| Mission-3 | 3D printing parts          | \$70,000,000             | 340,000     | \$170,000,000  | \$1,037,000,000 |
|           | Heating equipment          | \$222,000,000            |             |                |                 |
|           | Air processing equipment   | \$555,000,000            |             |                |                 |
|           | Water processing equipment | \$475,000,000            |             |                |                 |
| Mission-4 | Raw materials              | \$130,000,000            | 340,000     | \$170,000,000  | \$1,330,000,000 |
|           | Bricks making equipment    | \$385,000,000            |             |                |                 |
|           | Infrastructure parts       | \$150,000,000            |             |                |                 |
|           | Electronic parts           | \$370,000,000            |             |                |                 |

**Table S2.** Contents and cost of the second five missions.

| Missions   | Flights                  | Material cost estimation | Weight (kg) | Total cost         |
|------------|--------------------------|--------------------------|-------------|--------------------|
| Mission-6  | 100 people               | \$692,611,900.00         | 170,000.00  | \$783,363,900.00   |
|            | Food                     | \$90,000.00              |             |                    |
|            | Space Suits              | \$37,500,000.00          |             |                    |
|            | Drugs and Sanitary Items | \$2,312,000.00           |             |                    |
|            | Medical Equipment        | \$850,000.00             |             |                    |
|            | Fertilizers              | \$50,000,000.00          |             |                    |
| Mission-7  | 200 people               | \$1,385,223,800.00       | 255,000.00  | \$1,537,723,800.00 |
|            | cargo                    | \$152,500,000.00         |             |                    |
| Mission-8  | 200 people               | \$1,385,223,800.00       | 255,000.00  | \$1,537,723,800.00 |
|            | cargo                    | \$152,500,000.00         |             |                    |
| Mission-9  | 200 people               | \$1,385,223,800.00       | 255,000.00  | \$1,537,723,800.00 |
|            | cargo                    | \$152,500,000.00         |             |                    |
| Mission-10 | 200 people               | \$1,385,223,800.00       | 255,000.00  | \$1,537,723,800.00 |
|            | cargo                    | \$152,500,000.00         |             |                    |
| Mission-11 | 100 people               | \$692,611,900.00         | 170,000.00  | \$845,111,900.00   |
|            | cargo                    | \$152,500,000.00         |             |                    |

## 2. Colony Fuel Usage

Table S3. Colony Fuel Usage.

|                                             |                 |            |                  |            |                 |            |                        |
|---------------------------------------------|-----------------|------------|------------------|------------|-----------------|------------|------------------------|
| Fuel Needed for Tourism =                   | 3991038.24      |            |                  |            |                 |            |                        |
| Fuel Needed for Deuterium =                 | 167588.8837     |            |                  |            |                 |            |                        |
| Fuel Needed for asteroid Mining =           | 4415325         |            |                  |            |                 |            |                        |
| Fuel Needed to send Platinum =              | 971371.5        |            |                  |            |                 |            |                        |
| Total Fuel Used Every year =                | 9545323.624     | kg         |                  |            |                 |            |                        |
| Total Fuel Needs to be produced every day = | 26151.57157     |            |                  |            |                 |            |                        |
| Total Methane required =                    | 5811.460349     |            |                  |            |                 |            |                        |
| Total Oxygen Required =                     | 20340.11122     |            |                  |            |                 |            |                        |
| Water Consumption needed by a person =      | 8               | kg         |                  | per day    |                 |            |                        |
| With Margin                                 | 9.6             | kg         |                  | per day    |                 |            |                        |
| For 1200 people                             | 11520           | kg         |                  | per day    |                 |            |                        |
| Mol Mass of CO <sub>2</sub>                 | 44.01           |            |                  |            |                 |            |                        |
| Mol Mass of H <sub>2</sub>                  | 2.01588         |            |                  |            |                 |            |                        |
| Mol Mass of CH <sub>4</sub>                 | 16.04           |            |                  |            |                 |            |                        |
| Mol Mass of H <sub>2</sub> O                | 18.01528        |            |                  |            |                 |            |                        |
| Reaction =                                  | CO <sub>2</sub> | +          | 4 H <sub>2</sub> | =          | CH <sub>4</sub> | +          | 2H <sub>2</sub> O      |
| Number of Molecules required =              | 2.18183E+26     |            | 8.72734E+26      |            | 2.18183E+26     |            | 4.36367E+26            |
| Kg of each molecule required =              | 15945.28491     | kg per day | 2921.497927      | kg per day | 5811.460349     | kg per day | 13054.25005 kg per day |
| Methane required everyday =                 | 5811.460349     | kg         |                  |            |                 |            |                        |
| Water produced everyday =                   | 13054.25005     | kg         |                  |            |                 |            |                        |
| One machine can dig upto =                  | 68.2            | kg/hr      |                  |            |                 |            |                        |
| One machine can dig upto in one day =       | 1691.36         | kg         |                  |            |                 |            |                        |
| Water required for h <sub>2</sub> =         | 26293.48135     | kg         |                  |            |                 |            |                        |
| Number of Machine =                         | 16              |            |                  |            |                 |            |                        |
| Oxygen produced from electrolysis =         | 23371.98342     | kg         |                  |            |                 |            |                        |
| Oxygen produced for fuel =                  | 20340.11122     | kg         |                  |            |                 |            |                        |
| Oxygen for life support =                   | 3031.872197     | kg         |                  |            |                 |            |                        |
| Prop Produced per year =                    | 26151.57157     | kg         |                  |            |                 |            |                        |
| Prop Produced every year =                  | 9545323.624     | kg         |                  |            |                 |            |                        |

### 3. Asteroid Mining Propellant Expenditure

**Table S4.** Fuel and payload calculations for Asteroid Mining.

|                                                        |                  |    |   |                                        |      |          |      |
|--------------------------------------------------------|------------------|----|---|----------------------------------------|------|----------|------|
| <b>Mass Ratio, from Mars=</b>                          | <b>4.463</b>     |    |   |                                        |      |          |      |
| <b>Payload To Asteroid Belt =</b>                      | 3750000          | kg | = | 3750                                   | tons |          |      |
| <b>Total Dry Mass =</b>                                | 750000           | kg | = | 750                                    | tons |          |      |
| <b>Total propellant to and from the asteroid =</b>     | 26491950         | kg | = | 26491.95                               | tons |          |      |
| <b>Tankage weight =</b>                                | 18544365         | kg | = | 18544.365                              | tons |          |      |
| <b>Total Mass one way (with asteroid propellant) =</b> | 49536315         | kg | = | 49536.315                              | tons |          |      |
| <b>Mass Ratio Required =</b>                           | 1.35             |    |   |                                        |      |          |      |
| <b>Payload from 16 pshye</b>                           | 7500000          | kg |   |                                        |      |          |      |
| <b>Total Dry Mass</b>                                  | 1500000          | kg | = | 1500                                   | tons |          |      |
| <b>Propellant Mass</b>                                 | 3150000          | kg | = | 3150                                   | tons |          |      |
| <b>Total Payload brought =</b>                         | 7500000          | kg | = | 7500                                   | tons |          |      |
| <b>At 75% Efficiently Processing =</b>                 | 5625000          | kg | = | 5625                                   | tons |          |      |
| <b>At 25% Platinum =</b>                               | 1406250          | kg | = | 1406.25                                | tons |          |      |
| <b>Remaining Pay load =</b>                            | 4218750          | kg | = | 4218.75                                | tons |          |      |
| <b>Number of Transits =</b>                            | 2.75             |    |   | per year                               |      |          |      |
| <b>Kg that can be transported per trip =</b>           | 85000            | kg |   |                                        | =    | 85       | tons |
| <b>Dry Mass =</b>                                      | 17000            | kg |   | Assumption: 2 cargo ships every 2 year | =    | 17       | tons |
| <b>Propellant Mass =</b>                               | 353226           | kg |   | Assumption: 85000kg can be transported | =    | 353.226  | tons |
| <b>Tankage mass =</b>                                  | 247258.2         | kg |   |                                        | =    | 247.2582 | tons |
| <b>Total Mass of the S/c =</b>                         | 702484.2         | kg |   |                                        | =    | 702.4842 | tons |
| <b>Cost of Platinum on Earth =</b>                     | 26,500.00        | \$ |   |                                        |      |          |      |
| <b>Cost of Transport Per ship =</b>                    | 140496840        | \$ |   |                                        |      |          |      |
| <b>Cost of Transport Per Year =</b>                    | 386366310        | \$ |   |                                        |      |          |      |
| <b>Estimated Cost of our payload =</b>                 | 6,194,375,000.00 | \$ |   |                                        |      |          |      |
| <b>Revenue generated in one year =</b>                 | 5,808,008,690.00 | \$ |   |                                        |      |          |      |

#### 4. Different Tourist Schemes

Table S5. Tourism Cost Scheme A.

| TOURISM COST SCHEME A - 95 days journey |                                   |             |                             |              |
|-----------------------------------------|-----------------------------------|-------------|-----------------------------|--------------|
| Fuel production on Mars per day =       | 9545323.624                       | kg          | No. of tourists (per trip)= | 100 people   |
|                                         |                                   |             | Number of days travel =     | 22           |
| Mass Ratio, from Mars=                  | 4.463                             |             | Payload per person=         | 147 kg       |
| Mass Ratio, from Earth =                | 29                                |             | Total payload weight =      | 14700 kg     |
| Total dry mass =                        | (20% of the total payload)        | 2940        |                             |              |
| Propellant, from Mars=                  |                                   | 61087.32    | Frequency =                 | 4 in 1 years |
| Propellant, from Earth                  |                                   | 493920      |                             |              |
| Total Propellant Required =             |                                   | 555007.32   |                             |              |
| Tank Weight =                           | (7% of total propellant required) | 345744      |                             |              |
| Total Weight S/C from Earth=            |                                   | 857304      |                             |              |
| Total Weight S/C from Mars=             |                                   | 424471.32   |                             |              |
|                                         |                                   |             |                             |              |
| Rate of exports from E =                |                                   | 500         |                             | \$/kg        |
| Rate of exports from M =                |                                   | 200         |                             | \$/kg        |
|                                         |                                   |             |                             |              |
| Cost from Earth =                       |                                   | 428652000   |                             | \$           |
| Cost from Mars =                        |                                   | 84894264    |                             | \$           |
| Total Cost (per trip) =                 |                                   | 513546264   |                             | \$           |
|                                         |                                   |             |                             |              |
| Cost per tourist (per trip) =           |                                   | 5135462.64  |                             | \$           |
| SP per tourist (per trip) =             |                                   | 19000000    |                             | \$           |
| Revenue generated per tourist =         |                                   | 13864537.36 |                             | \$           |
| Total revenue (per trip) =              |                                   | 1386453736  |                             | \$           |
| <b>TOTAL REVENUE =</b>                  |                                   | 5545814944  |                             | \$           |

**Table S6.** Tourism Cost Scheme B.

| <b>TOURISM COST SCHEME B - 160 days</b> |                                   |            |                             |       |        |
|-----------------------------------------|-----------------------------------|------------|-----------------------------|-------|--------|
| Fuel production on Mars per day =       | 9545323.624                       | kg         | No. of tourists (per trip)= | 100   | people |
|                                         |                                   |            | Number of days travel =     | 84    |        |
| Mass Ratio, from Mars=                  | 4.463                             |            | Payload per person=         | 364   | kg     |
| Mass Ratio, from Earth =                | 20                                |            | Total payload weight =      | 36400 | kg     |
| Total dry mass =                        | (20% of the total payload)        | 7280       |                             |       | years  |
|                                         |                                   | kg         |                             |       |        |
| Propellant, from Mars=                  |                                   | 151263.84  | Frequency =                 | 4     | in 1   |
| Propellant, from Earth                  |                                   | 829920     |                             |       |        |
|                                         |                                   | kg         |                             |       |        |
| Total Propellant Required =             |                                   | 981183.84  |                             |       |        |
|                                         |                                   | kg         |                             |       |        |
| Tank Weight =                           | (7% of total propellant required) | 580944     |                             |       |        |
|                                         |                                   | kg         |                             |       |        |
| Total Weight S/C from Earth=            |                                   | 1454544    |                             |       |        |
|                                         |                                   | kg         |                             |       |        |
| Total Weight S/C from Mars=             |                                   | 775887.84  |                             |       |        |
|                                         |                                   | kg         |                             |       |        |
|                                         |                                   |            |                             |       |        |
| Rate of exports from E =                |                                   | 500        |                             |       |        |
|                                         |                                   | \$/kg      |                             |       |        |
| Rate of exports from M =                |                                   | 200        |                             |       |        |
|                                         |                                   | \$/kg      |                             |       |        |
|                                         |                                   |            |                             |       |        |
| Cost from Earh =                        |                                   | 727272000  |                             |       |        |
|                                         |                                   | \$         |                             |       |        |
| Cost from Mars =                        |                                   | 155177568  |                             |       |        |
|                                         |                                   | \$         |                             |       |        |
| Total Cost (per trip) =                 |                                   | 882449568  |                             |       |        |
|                                         |                                   | \$         |                             |       |        |
|                                         |                                   |            |                             |       |        |
| Cost per tourist (per trip) =           |                                   | 8824495.68 |                             |       |        |
|                                         |                                   | \$         |                             |       |        |
| SP per tourist (per trip) =             |                                   | 16000000   |                             |       |        |
|                                         |                                   | \$         |                             |       |        |
| Revenue generated per tourist =         |                                   | 7175504.32 |                             |       |        |
|                                         |                                   | \$         |                             |       |        |
| Total revenue (per trip) =              |                                   | 717550432  |                             |       |        |
|                                         |                                   | \$         |                             |       |        |
| <b>TOTAL REVENUE =</b>                  |                                   | 2870201728 |                             |       |        |
|                                         |                                   | \$         |                             |       |        |

Table S7. Tourism Cost Scheme C.

| TOURISM COST SCHEME C             |                                   |                   |                             |             |              |
|-----------------------------------|-----------------------------------|-------------------|-----------------------------|-------------|--------------|
| Fuel production on Mars per day = | 9545323.624                       | kg                | No. of tourists (per trip)= | 200         | people       |
|                                   |                                   |                   | Number of days travel =     | 120         |              |
| Mass Ratio, from Mars=            | 4.463                             |                   | Payload per person=         | 490         | kg           |
| Mass Ratio, from Earth =          | 15.8                              |                   | Total payload weight =      | 98000       | kg           |
| Total dry mass =                  | (20% of the total payload)        | 19600             |                             |             |              |
| Propellant, from Mars=            |                                   | 407248.8          | kg                          | Frequency = | 4 in 1 years |
| Propellant, from Earth            |                                   | 1740480           | kg                          |             |              |
| Total Propellant Required =       |                                   | 2147728.8         | kg                          |             |              |
| Tank Weight =                     | (7% of total propellant required) | 1218336           | kg                          |             |              |
| Total Weight S/C from Earth=      |                                   | 3076416           | kg                          |             |              |
| Total Weight S/C from Mars=       |                                   | 1743184.8         | kg                          |             |              |
| Rate of exports from E =          |                                   | 500               | \$/kg                       |             |              |
| Rate of exports from M =          |                                   | 200               | \$/kg                       |             |              |
| Cost from Earh =                  |                                   | 1538208000        | \$                          |             |              |
| Cost from Mars =                  |                                   | 348636960         | \$                          |             |              |
| Total Cost (per trip) =           |                                   | 1886844960        | \$                          |             |              |
| Cost per tourist (per trip) =     |                                   | 9434224.8         | \$                          |             |              |
| SP per tourist (per trip) =       |                                   | 13000000          | \$                          |             |              |
| Revenue generated per tourist =   |                                   | 3565775.2         | \$                          |             |              |
| Total revenue (per trip) =        |                                   | 713155040         | \$                          |             |              |
| <b>TOTAL REVENUE =</b>            |                                   | <b>2852620160</b> | <b>\$</b>                   |             |              |

Table S8. Tourism Cost Scheme D.

| TOURISM COST SCHEME D - 450 days  |                                   |            |                             |       |            |
|-----------------------------------|-----------------------------------|------------|-----------------------------|-------|------------|
| Fuel production on Mars per day = | 9545323.624                       | kg         | No. of tourists (per trip)= | 100   | people     |
|                                   |                                   |            | Number of days travel =     | 240   |            |
| Mass Ratio, from Mars=            | 4.463                             |            | Payload per person=         | 910   | kg         |
| Mass Ratio, from Earth =          | 6                                 |            | Total payload weight =      | 91000 | kg         |
| Total dry mass =                  | (20% of the total payload)        | 18200      |                             |       |            |
| Propellant, from Mars=            |                                   | 378159.6   | Frequency =                 | 4     | in 1 years |
| Propellant, from Earth            |                                   | 546000     |                             |       |            |
| Total Propellant Required =       |                                   | 924159.6   |                             |       |            |
| Tank Weight =                     | (7% of total propellant required) | 382200     |                             |       |            |
| Total Weight S/C from Earth=      |                                   | 1037400    |                             |       |            |
| Total Weight S/C from Mars=       |                                   | 869559.6   |                             |       |            |
|                                   |                                   |            |                             |       |            |
| Rate of exports from E =          |                                   | 500        |                             |       |            |
| Rate of exports from M =          |                                   | 200        |                             |       |            |
|                                   |                                   |            |                             |       |            |
| Cost from Earh =                  |                                   | 518700000  |                             |       |            |
| Cost from Mars =                  |                                   | 173911920  |                             |       |            |
| Total Cost (per trip) =           |                                   | 692611920  |                             |       |            |
|                                   |                                   |            |                             |       |            |
| Cost per tourist (per trip) =     |                                   | 6926119.2  |                             |       |            |
| SP per tourist (per trip) =       |                                   | 10000000   |                             |       |            |
| Revenue generated per tourist =   |                                   | 3073880.8  |                             |       |            |
| Total revenue (per trip) =        |                                   | 307388080  |                             |       |            |
| <b>TOTAL REVENUE =</b>            |                                   | 1229552320 |                             |       |            |

## 5. Examples of Different Tourist Schemes

**Table S9.** Different Tourist Trip Trajectories in the year 2035.

| 2035 TRIPS      |              |                |              |                  |                 |                 |                      |       |            |
|-----------------|--------------|----------------|--------------|------------------|-----------------|-----------------|----------------------|-------|------------|
| Earth_Departure | Dest_Arrival | Dest_Departure | Earth_Return | Stay time (days) | Duration (days) | Total DV (km/s) | Reentry speed (km/s) | Route | Mass Ratio |
| Jan-07-2035     | Feb-01-2035  | Feb-11-2035    | Apr-17-2035  | 10               | 100             | 9,72            | 11,21                | EA-AE | 28,55      |
| Jan-07-2035     | Jan-27-2035  | Feb-01-2035    | Apr-07-2035  | 5                | 90              | 9,86            | 11,09                | EA-AE | 29,96      |
| Jan-07-2035     | Feb-16-2035  | Feb-26-2035    | Jun-01-2035  | 10               | 145             | 8,15            | 11,18                | EA-AE | 16,62      |
| Dec-13-2035     | Apr-21-2036  | May-01-2036    | Jun-10-2036  | 10               | 180             | 9,36            | 12,56                | EA-AE | 25,22      |
| Feb-01-2035     | May-12-2035  | Jun-01-2035    | Nov-28-2035  | 20               | 300             | 7,92            | 11,87                | EA-AE | 15,35      |
| Feb-11-2035     | Jun-01-2035  | Jun-26-2035    | Nov-28-2035  | 25               | 290             | 8,26            | 12,1                 | EA-AE | 17,26      |
| Mar-18-2035     | Aug-10-2035  | Aug-30-2035    | Jan-02-2036  | 20               | 290             | 7,93            | 11,55                | EA-AE | 15,40      |
| Mar-28-2035     | Feb-01-2036  | Mar-02-2036    | Sep-23-2036  | 30               | 545             | 4,76            | 11,7                 | EA-AE | 5,16       |
| Oct-04-2035     | Mar-12-2036  | Apr-01-2036    | Sep-28-2036  | 20               | 360             | 5,65            | 11,63                | EA-AE | 7,02       |

## 6. Cost Plan

Table S10. A complete Cost Plan Analysis.

| Phase                       | Year                                | Details                   | Outflow Cost estimation   | Total Outflow        | Outflow 5% margin    | Inflow cost estimation | Total Inflow         | Inflow 5% margin     |  |  |                     |  |                     |
|-----------------------------|-------------------------------------|---------------------------|---------------------------|----------------------|----------------------|------------------------|----------------------|----------------------|--|--|---------------------|--|---------------------|
| Pre-Initiative              | 2034                                | MADE member's investments |                           | \$41,525,800,000.00  | \$43,602,090,000.00  | \$5,000,000,000.00     | \$40,366,666,665.00  | \$42,384,999,998.25  |  |  |                     |  |                     |
|                             |                                     | MADE infrastructure       | \$1,860,000,000.00        |                      |                      |                        |                      |                      |  |  |                     |  |                     |
|                             |                                     | Spacecraft manufacturing  | \$1,500,000,000.00        |                      |                      |                        |                      |                      |  |  |                     |  |                     |
|                             |                                     | MADE operating cost       | \$3,200,000,000.00        |                      |                      |                        |                      |                      |  |  |                     |  |                     |
|                             | 2036                                | MADE member's investments |                           |                      |                      | \$5,000,000,000.00     |                      |                      |  |  |                     |  |                     |
|                             |                                     | MADE infrastructure       | \$1,860,000,000.00        |                      |                      |                        |                      |                      |  |  |                     |  |                     |
|                             |                                     | MADE operating cost       | \$3,200,000,000.00        |                      |                      |                        |                      |                      |  |  |                     |  |                     |
|                             |                                     | Spacecraft manufacturing  | \$1,500,000,000.00        |                      |                      |                        |                      |                      |  |  |                     |  |                     |
|                             |                                     | Broadcasting              |                           |                      |                      | \$183,333,333.00       |                      |                      |  |  |                     |  |                     |
|                             |                                     | Mission-1                 | \$1,287,500,000.00        |                      |                      |                        |                      |                      |  |  |                     |  |                     |
|                             | 2038                                | MADE member's investments |                           |                      |                      | \$5,000,000,000.00     |                      |                      |  |  |                     |  |                     |
|                             |                                     | MADE operating cost       | \$3,200,000,000.00        |                      |                      |                        |                      |                      |  |  |                     |  |                     |
|                             |                                     | Spacecraft manufacturing  | \$1,500,000,000.00        |                      |                      |                        |                      |                      |  |  |                     |  |                     |
|                             |                                     | Mission-2                 | \$1,096,300,000.00        |                      |                      |                        |                      |                      |  |  |                     |  |                     |
|                             | 2040                                | Broadcasting              |                           |                      |                      | \$183,333,333.00       |                      |                      |  |  |                     |  |                     |
|                             |                                     | MADE member's investments |                           |                      |                      | \$5,000,000,000.00     |                      |                      |  |  |                     |  |                     |
|                             |                                     | MADE operating cost       | \$3,200,000,000.00        |                      |                      |                        |                      |                      |  |  |                     |  |                     |
|                             |                                     | Training program at MADE  | \$1,260,000,000.00        |                      |                      | \$3,150,000,000.00     |                      |                      |  |  |                     |  |                     |
|                             |                                     | Spacecraft manufacturing  | \$1,500,000,000.00        |                      |                      |                        |                      |                      |  |  |                     |  |                     |
|                             |                                     | Mission-3                 | \$1,037,000,000.00        |                      |                      |                        |                      |                      |  |  |                     |  |                     |
|                             | 2042                                | Broadcasting              |                           |                      |                      | \$183,333,332.00       |                      |                      |  |  |                     |  |                     |
|                             |                                     | MADE member's investments |                           |                      |                      | \$5,000,000,000.00     |                      |                      |  |  |                     |  |                     |
|                             |                                     | MADE operating cost       | \$3,200,000,000.00        |                      |                      |                        |                      |                      |  |  |                     |  |                     |
|                             |                                     | Training program at MADE  | \$1,260,000,000.00        |                      |                      | \$3,150,000,000.00     |                      |                      |  |  |                     |  |                     |
|                             |                                     | Spacecraft manufacturing  | \$1,500,000,000.00        |                      |                      |                        |                      |                      |  |  |                     |  |                     |
|                             |                                     | Mission-4                 | \$1,330,000,000.00        |                      |                      |                        |                      |                      |  |  |                     |  |                     |
|                             | 2044                                | Broadcasting              |                           |                      |                      | \$183,333,333.00       |                      |                      |  |  |                     |  |                     |
|                             |                                     | MADE member's investments |                           |                      |                      | \$5,000,000,000.00     |                      |                      |  |  |                     |  |                     |
|                             |                                     | MADE operating cost       | \$3,200,000,000.00        |                      |                      |                        |                      |                      |  |  |                     |  |                     |
|                             |                                     | Training program at MADE  | \$1,260,000,000.00        |                      |                      | \$3,150,000,000.00     |                      |                      |  |  |                     |  |                     |
|                             |                                     | Spacecraft manufacturing  | \$1,500,000,000.00        |                      |                      |                        |                      |                      |  |  |                     |  |                     |
|                             |                                     | Mission-5                 | \$1,075,000,000.00        |                      |                      |                        |                      |                      |  |  |                     |  |                     |
|                             |                                     | Broadcasting              |                           |                      |                      | \$183,333,333.00       |                      |                      |  |  |                     |  |                     |
| End of Pre-Initiative phase |                                     |                           |                           |                      |                      |                        |                      | \$-1,217,090,001.75  |  |  |                     |  |                     |
| Settlement                  | 2046                                | MADE member's investments |                           | \$129,047,524,170.00 | \$135,499,900,378.50 | \$5,000,000,000.00     | \$221,899,060,244.50 | \$232,983,513,256.73 |  |  |                     |  |                     |
|                             |                                     | MADE operating cost       | \$3,200,000,000.00        |                      |                      |                        |                      |                      |  |  |                     |  |                     |
|                             |                                     | Training program at MADE  | \$1,260,000,000.00        |                      |                      | \$3,150,000,000.00     |                      |                      |  |  |                     |  |                     |
|                             |                                     | Mission-6                 | \$783,363,900.00          |                      |                      |                        |                      |                      |  |  |                     |  |                     |
|                             |                                     | Mars mining               |                           |                      |                      | \$746,575,239.00       |                      |                      |  |  |                     |  |                     |
|                             |                                     | Broadcasting              |                           |                      |                      | \$366,666,666.60       |                      |                      |  |  |                     |  |                     |
|                             | 2048                                | MADE member's investments |                           |                      |                      | \$5,000,000,000.00     |                      |                      |  |  |                     |  |                     |
|                             |                                     | MADE operating cost       | \$3,200,000,000.00        |                      |                      |                        |                      |                      |  |  |                     |  |                     |
|                             |                                     | Training program at MADE  | \$1,260,000,000.00        |                      |                      | \$3,150,000,000.00     |                      |                      |  |  |                     |  |                     |
|                             |                                     | Mars mining               |                           |                      |                      | \$746,575,239.00       |                      |                      |  |  |                     |  |                     |
|                             |                                     | Mission-7                 | \$1,537,723,800.00        |                      |                      |                        |                      |                      |  |  |                     |  |                     |
|                             |                                     | Asteroid mining           | \$5,500,000,000.00        |                      |                      |                        |                      |                      |  |  |                     |  |                     |
|                             | 2050                                | Broadcasting              |                           |                      |                      | \$366,666,666.60       |                      |                      |  |  |                     |  |                     |
|                             |                                     | MADE member's investments |                           |                      |                      | \$5,000,000,000.00     |                      |                      |  |  |                     |  |                     |
|                             |                                     | MADE operating cost       | \$3,200,000,000.00        |                      |                      |                        |                      |                      |  |  |                     |  |                     |
|                             |                                     | Training program at MADE  | \$1,260,000,000.00        |                      |                      | \$3,150,000,000.00     |                      |                      |  |  |                     |  |                     |
|                             |                                     | Mars mining               |                           |                      |                      | \$746,575,239.00       |                      |                      |  |  |                     |  |                     |
|                             |                                     | Mission-8                 | \$1,537,723,800.00        |                      |                      |                        |                      |                      |  |  |                     |  |                     |
|                             | 2052                                | Broadcasting              |                           |                      |                      | \$366,666,666.60       |                      |                      |  |  |                     |  |                     |
|                             |                                     | MADE member's investments |                           |                      |                      | \$5,000,000,000.00     |                      |                      |  |  |                     |  |                     |
|                             |                                     | MADE operating cost       | \$3,200,000,000.00        |                      |                      |                        |                      |                      |  |  |                     |  |                     |
|                             |                                     | Training program at MADE  | \$1,260,000,000.00        |                      |                      | \$3,150,000,000.00     |                      |                      |  |  |                     |  |                     |
|                             |                                     | Mars mining               |                           |                      |                      | \$746,575,239.00       |                      |                      |  |  |                     |  |                     |
|                             |                                     | Mission-9                 | \$1,537,723,800.00        |                      |                      |                        |                      |                      |  |  |                     |  |                     |
|                             | 2054                                | Broadcasting              |                           |                      |                      | \$549,999,999.90       |                      |                      |  |  |                     |  |                     |
|                             |                                     | MADE member's investments |                           |                      |                      | \$5,000,000,000.00     |                      |                      |  |  |                     |  |                     |
|                             |                                     | MADE operating cost       | \$3,200,000,000.00        |                      |                      |                        |                      |                      |  |  |                     |  |                     |
|                             |                                     | Training program at MADE  | \$1,260,000,000.00        |                      |                      | \$3,150,000,000.00     |                      |                      |  |  |                     |  |                     |
|                             |                                     | Mars mining               |                           |                      |                      | \$746,575,239.00       |                      |                      |  |  |                     |  |                     |
|                             |                                     | Mission-10                | \$1,537,723,800.00        |                      |                      |                        |                      |                      |  |  |                     |  |                     |
|                             |                                     | Broadcasting              |                           |                      |                      | \$549,999,999.90       |                      |                      |  |  |                     |  |                     |
|                             | End of settlement phase             | 2056                      | MADE member's investments |                      |                      |                        |                      |                      |  |  | \$5,000,000,000.00  |  | \$97,483,612,878.23 |
|                             |                                     |                           | MADE operating cost       |                      |                      | \$3,200,000,000.00     |                      |                      |  |  |                     |  |                     |
| Mars mining                 |                                     |                           |                           | \$746,575,239.00     |                      |                        |                      |                      |  |  |                     |  |                     |
| Tourism                     |                                     |                           | \$15,901,810,848.00       | \$28,400,000,000.00  |                      |                        |                      |                      |  |  |                     |  |                     |
| Mission-11                  |                                     |                           | \$845,111,900.00          |                      |                      |                        |                      |                      |  |  |                     |  |                     |
| Broadcasting                |                                     |                           |                           | \$366,666,666.60     |                      |                        |                      |                      |  |  |                     |  |                     |
| 2057                        |                                     | Tourism                   | \$15,901,810,848.00       | \$28,400,000,000.00  |                      |                        |                      |                      |  |  |                     |  |                     |
|                             |                                     | Broadcasting              |                           | \$366,666,666.60     |                      |                        |                      |                      |  |  |                     |  |                     |
|                             |                                     | MADE member's investments |                           | \$5,000,000,000.00   |                      |                        |                      |                      |  |  |                     |  |                     |
|                             |                                     | MADE operating cost       | \$3,200,000,000.00        |                      |                      |                        |                      |                      |  |  |                     |  |                     |
|                             |                                     | Mars mining               |                           | \$746,575,239.00     |                      |                        |                      |                      |  |  |                     |  |                     |
|                             |                                     | Tourism                   | \$15,901,810,848.00       | \$28,400,000,000.00  |                      |                        |                      |                      |  |  |                     |  |                     |
| 2058                        |                                     | Asteroid mining           | \$386,366,310.00          | \$6,194,375,000.00   |                      |                        |                      |                      |  |  |                     |  |                     |
|                             |                                     | Broadcasting              |                           | \$733,333,333.20     |                      |                        |                      |                      |  |  |                     |  |                     |
|                             |                                     | Tourism                   | \$15,901,810,848.00       | \$28,400,000,000.00  |                      |                        |                      |                      |  |  |                     |  |                     |
|                             |                                     | MADE operating cost       | \$3,200,000,000.00        |                      |                      |                        |                      |                      |  |  |                     |  |                     |
|                             |                                     | Asteroid mining           | \$386,366,310.00          | \$6,194,375,000.00   |                      |                        |                      |                      |  |  |                     |  |                     |
|                             |                                     | Broadcasting              |                           | \$366,666,666.60     |                      |                        |                      |                      |  |  |                     |  |                     |
| 2059                        |                                     | Tourism                   | \$15,901,810,848.00       | \$28,400,000,000.00  |                      |                        |                      |                      |  |  |                     |  |                     |
|                             |                                     | MADE operating cost       | \$3,200,000,000.00        |                      |                      |                        |                      |                      |  |  |                     |  |                     |
|                             |                                     | Asteroid mining           | \$386,366,310.00          | \$6,194,375,000.00   |                      |                        |                      |                      |  |  |                     |  |                     |
|                             |                                     | Broadcasting              |                           | \$366,666,666.60     |                      |                        |                      |                      |  |  |                     |  |                     |
|                             |                                     | Tourism                   | \$15,901,810,848.00       | \$28,400,000,000.00  |                      |                        |                      |                      |  |  |                     |  |                     |
|                             |                                     | MADE operating cost       | \$3,200,000,000.00        |                      |                      |                        |                      |                      |  |  |                     |  |                     |
| 2060                        |                                     | Broadcasting              |                           | \$549,999,999.90     |                      |                        |                      |                      |  |  |                     |  |                     |
|                             |                                     | Asteroid mining           | \$386,366,310.00          | \$6,194,375,000.00   |                      |                        |                      |                      |  |  |                     |  |                     |
|                             |                                     | Mars Mining               |                           | \$746,575,239.00     |                      |                        |                      |                      |  |  |                     |  |                     |
|                             |                                     | End of settlement phase   |                           |                      |                      |                        |                      |                      |  |  | \$97,483,612,878.23 |  |                     |
|                             | Payback to MADE member's investment |                           |                           |                      |                      |                        |                      |                      |  |  | \$32,483,612,878.23 |  |                     |
| Self-Sustaining phase       | 2061                                | Tourism                   | \$15,901,810,848.00       | \$21,421,495,252.00  | \$22,492,570,014.00  | \$28,400,000,000.00    | \$35,890,950,238.90  | \$37,685,497,750.85  |  |  |                     |  |                     |
|                             |                                     | Made Operation cost       | \$5,000,000,000.00        |                      |                      |                        |                      |                      |  |  |                     |  |                     |
|                             |                                     | Broadcasting              |                           |                      |                      | \$549,999,999.90       |                      |                      |  |  |                     |  |                     |
|                             |                                     | Asteroid mining           | \$386,366,310.00          |                      |                      | \$6,194,375,000.00     |                      |                      |  |  |                     |  |                     |
|                             |                                     | Mars Minine               | \$133,318,094.00          |                      |                      | \$746,575,239.00       |                      |                      |  |  |                     |  |                     |

**Author Contributions:** Conceptualization, Akash Patel, Bharadwaj Shastri and Arvind Mukundan; data curation, Akash Patel, Alice Phen, Heeral Bhatt and Bharadwaj Shastri; formal analysis, Heeral Bhatt and Alice Phen; funding acquisition, Arvind Mukundan, and Hsiang-Chen Wang; investigation, Bharadwaj Shastri, Heeral Bhatt and Arvind Mukundan; methodology, Bharadwaj Shastri, Akash Patel and Arvind Mukundan; project administration, Arvind Mukundan and Hsiang-Chen Wang; resources, Arvind Mukundan; software, Alice Phen, Akash Patel and Arvind Mukundan; supervision, Bharadwaj Shastri, Arvind Mukundan and Hsiang-Chen Wang; validation, Bharadwaj Shastri, Akash Patel and Arvind Mukundan; writing—original draft, Arvind Mukundan; writing—review and editing, Arvind Mukundan and Hsiang-Chen Wang. All authors have read and agreed to the published version of the manuscript.

**Funding:** This research was supported by the National Science and Technology Council, The Republic of China, under the grants NSTC 111-2221-E-194-007. This work was financially/partially supported by the Advanced Institute of Manufacturing with High-tech Innovations (AIM-HI) and the Center for Innovative Research on Aging Society (CIRAS) from The Featured Areas Research Center Program within the framework of the Higher Education Sprout Project by the Ministry of Education (MOE) in Taiwan.

**Acknowledgments:** This study is the response to the Mars Society's Mars Colony Prize Competition. It was also selected as one of the finalists of the competition. <https://www.marssociety.org/news/2019/07/01/finalists-selected-for-mars-colony-prize-competition/> accessed on 8 March 2023. It was also published in the book, "Mars Colonies: Plans for Settling the Red Planet". The presentation of this study can be watched at, <https://www.youtube.com/watch?v=EX5hTEof5JI>

**Conflicts of Interest:** The authors declare no conflicts of interest.
