# Supplementary material for: The Dvaraka Initiative: Mars’s First Permanent Human Settlement Capable of Self-Sustenance
Source: MDPI journal article supplement (doi:10.3390/aerospace10030265), 2023-03-09
Supplement: s1 [file s1]

Archive with 1 entries (1 files):
- aerospace-2172916-supplementary.pdf
